# Supplementary material for: Nonhematopoietic IRAK1 drives arthritis via neutrophil chemoattractants
Source: PubMed Central journal article supplement (PMC9310529; doi:10.1172/jci.insight.149825), 2022-07-08
Supplement: jciinsight-7-149825-s008.pdf [file jciinsight-7-149825-s008.pdf]

1 Supplemental Data

2 Supplemental Figures

3 Supplemental Figure 1: Expression of IRAK1 across multiple cell types from WT and IRAK1KD  
4 mice

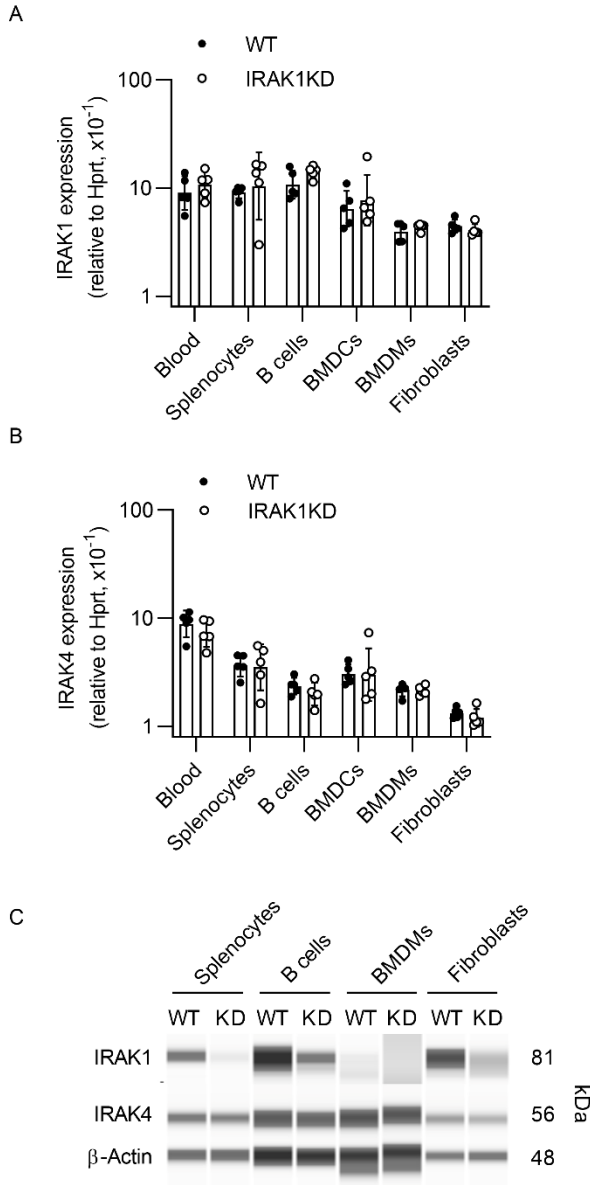

6 Expression of (A) IRAK1 and (B) IRAK4 transcript in indicated cell types. Data points are individual  
7 mice, geomeans  $\pm$  SD, unpaired t-test. (C) IRAK1 and IRAK4 protein expression in different cell  
8 types. Data are from five pooled mice per lane.

9

10

11

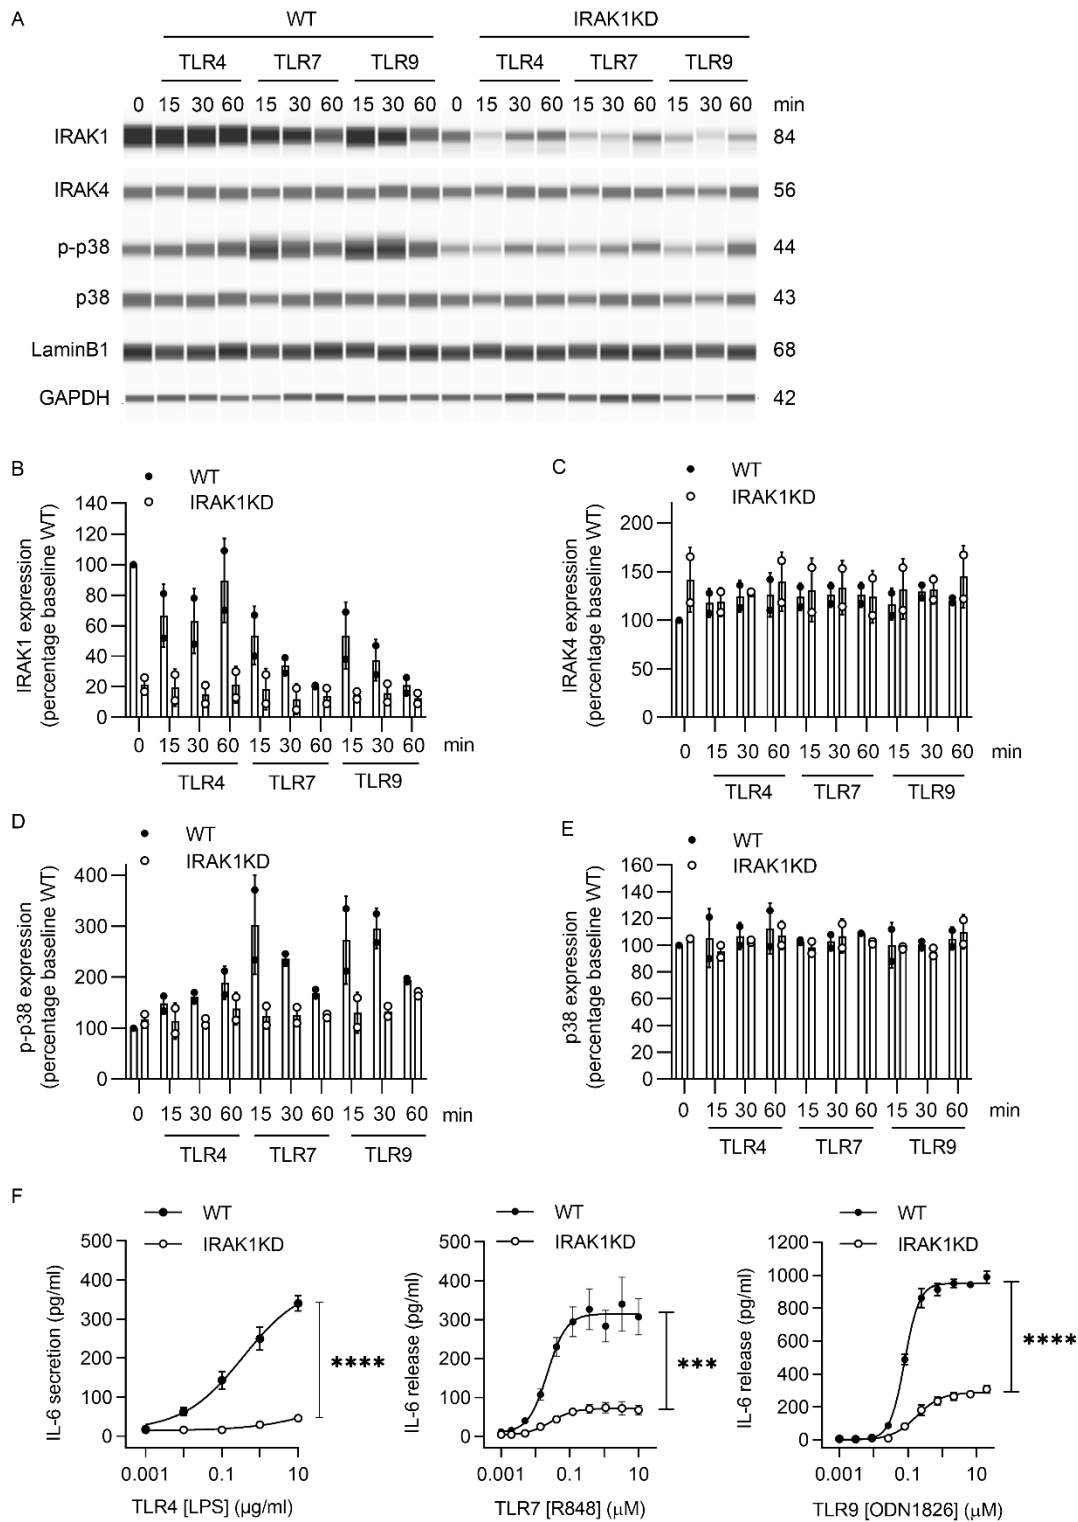

13

14

15 **(A)** Protein expression in B cells from WT and IRAK1KD following stimulation with TLR ligands (TLR4:

16 1 mg/ml LPS; TLR7: 1 mM R848; TLR9: 1 mM ODN1826). Expression of **(B)** IRAK1, **(C)** IRAK4, **(D)** p-

17 p38 and **(E)** p38, normalised to protein loading control and relative to WT baseline. Data are

18 representative **(A)** or means  $\pm$  SD **(B-E)** of two independent experiments, B cells were pooled from five

19 WT and IRAK1KD mice. (F) IL-6 secretion upon TLR4, TLR7 and TLR9 stimulation. Data points  
20 represent means of five individual mice with  $\pm$  SD; one representative of 2-3 independent experiments,  
21 unpaired t-test.

22

23

24 **Supplemental Figure 3: Reduced neutrophil recruitment in IRAK1KD mice after *in vivo* IL-**  
25 **1 $\beta$  challenge**

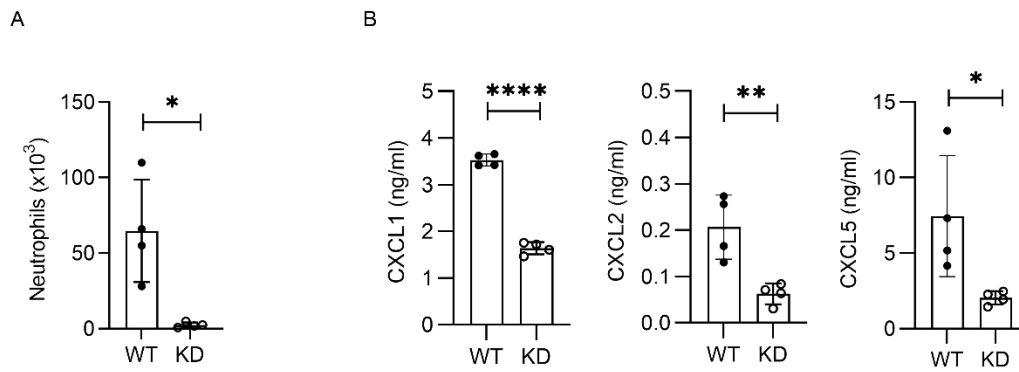

27 **(A)** Total counts of infiltrating neutrophils and **(B)** Chemokine secretion in air pouch exudates 6 h after  
28 injection of IL-1 $\beta$ . Data points are individual mice, means  $\pm$  SD. One representative of two independent  
29 experiments, unpaired t-test.

30  
31  
32  
33

34 **Supplemental Figure 4: Responses of human RA synovial fibroblasts to TLR and IL-**  
 35 **1 $\beta$  stimulation**  
 36

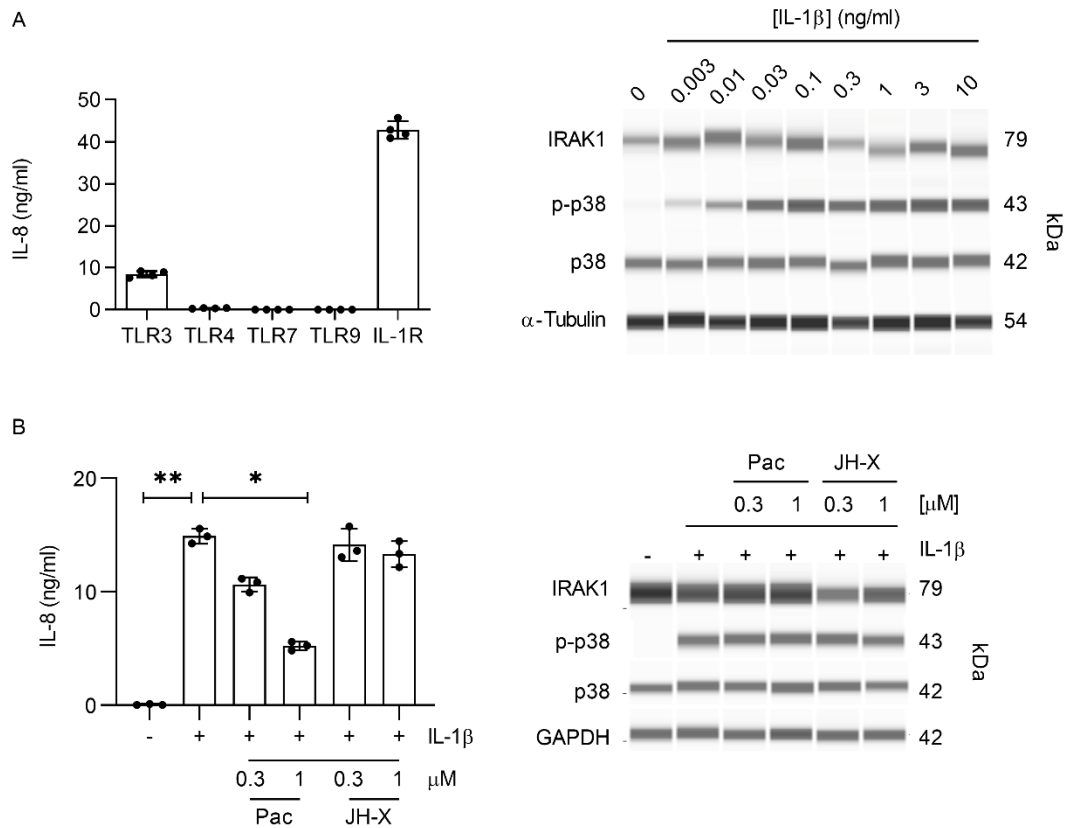

38 **(A)** Left, IL-8 secretion, bars represent means of quadruplicate measurements  $\pm$  SD. Right, protein  
 39 expression by capillary Western Blot from human RA synovial fibroblasts following IL-1 $\beta$  stimulation.  
 40 One representative of two independent experiments. **(B)** Left, IL-8 secretion upon IL-1 $\beta$  stimulation (0.1  
 41 ng/ml for 15 min, i.e. EC80) and IRAK1 inhibitor treatment, bars represent means of triplicate  
 42 measurements  $\pm$  SD, Kruskal-Wallis test with Dunn's post-test. Right, protein expression by capillary  
 43 Western Blot from human RA synovial fibroblasts. One representative of two independent experiments.

44  
 45  
 46

47 **Supplemental Figure 5: Analysis of human synovial fluids**

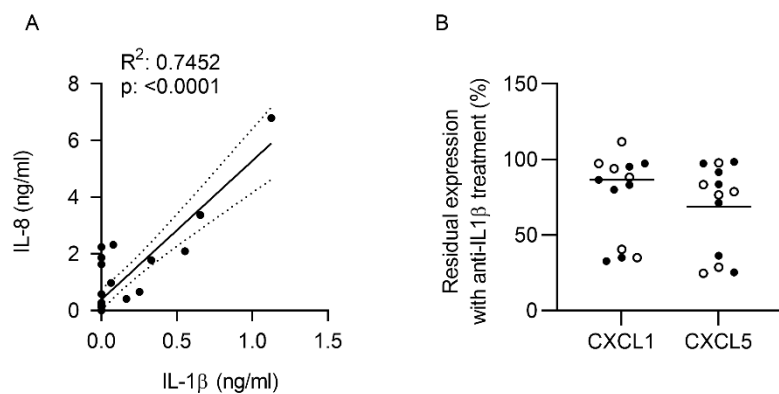

49 **(A)** IL-8 and IL-1 $\beta$  protein in individual human RA synovial fluids. Pearson correlation, dotted lines  
50 represent 95% confidence interval, **(B)** Residual expression of CXCL1 or CXCL5 from WT synovial  
51 fibroblasts treated with RA (n=7 patients, filled symbols) or gout (n=6 patients, open symbols) synovial  
52 fluids in presence of anti-IL1 $\beta$ , compared to untreated WT synovial fibroblasts; data from Figure 6B.  
53 Horizontal bars, medians.  
54

55 **Supplemental Tables**56 **Supplemental Table 1: Immune cell counts of IRAK1KD and WT mice**

| Thymus  |           | Total                                       | CD4-CD8-                                                      | CD4+CD8+                                                     | CD4+                                                                      | CD8+                                                                |
|---------|-----------|---------------------------------------------|---------------------------------------------------------------|--------------------------------------------------------------|---------------------------------------------------------------------------|---------------------------------------------------------------------|
|         | WT        | 79.4 ± 20.6                                 | 3.9 ± 1.9                                                     | 59.8 ± 8.6                                                   | 9.2 ± 5.7                                                                 | 2.3 ± 1.2                                                           |
|         | IRAK1KD   | 95.8 ± 27.6                                 | 7.8 ± 5.2                                                     | 65.4 ± 18.6                                                  | 16.6 ± 7.6                                                                | 4.4 ± 2.5                                                           |
| Spleen  |           | Total                                       | CD4 <sup>+</sup>                                              | CD8 <sup>+</sup>                                             | CD4 <sup>+</sup> CD8 <sup>-</sup><br>CD25 <sup>+</sup> Foxp3 <sup>+</sup> | CD3 <sup>+</sup> γδTCR <sup>+</sup>                                 |
|         | WT        | 54.4 ± 10                                   | 11.3 ± 3.6                                                    | 8.0 ± 2.0                                                    | 1.3 ± 0.3                                                                 | 0.3 ± 0.1                                                           |
|         | IRAK1KD   | 46.3 ± 18.3                                 | 9.1 ± 3.9                                                     | 6.7 ± 2.6                                                    | 1.1 ± 0.5                                                                 | 0.3 ± 0.1                                                           |
|         |           | CD11b <sup>+</sup><br>Ly6G/C <sup>low</sup> | CD11b <sup>+</sup><br>Ly6G/C <sup>dim</sup>                   | CD11b <sup>+</sup><br>Ly6G/C <sup>high</sup>                 | CD11c <sup>dim</sup> CD11b <sup>-</sup><br>B220 <sup>+</sup> pDC          | CD11c <sup>high</sup> CD11b <sup>-</sup><br>B220 <sup>-</sup> cDC   |
|         | WT        | 2.0 ± 0.5                                   | 0.8 ± 0.1                                                     | 1.0 ± 0.5                                                    | 0.7 ± 0.1                                                                 | 0.2 ± 0.1                                                           |
| IRAK1KD | 1.9 ± 0.6 | 0.7 ± 0.3                                   | 0.7 ± 0.3                                                     | 0.7 ± 0.3                                                    | 0.3 ± 0.1                                                                 |                                                                     |
| MLN     |           | Total                                       | CD4 <sup>+</sup>                                              | CD8 <sup>+</sup>                                             | CD19 <sup>+</sup>                                                         | CD11c <sup>dim</sup> CD11b <sup>-</sup><br>B220 <sup>+</sup> pDC    |
|         | WT        | 12.8 ± 6.0                                  | 5.8 ± 3.9                                                     | 3.8 ± 1.6                                                    | 4.1 ± 1.9                                                                 | 0.1 ± 0.1                                                           |
|         | IRAK1KD   | 15.0 ± 4.7                                  | 6.8 ± 2.2                                                     | 4.4 ± 1.2                                                    | 4.6 ± 1.6                                                                 | 0.1 ± 0.04                                                          |
| BM      |           | Total                                       | B220 <sup>+</sup> CD43 <sup>+</sup><br>CD19 <sup>+</sup> proB | B220 <sup>+</sup> CD43 <sup>-</sup><br>IgM <sup>-</sup> preB | B220 <sup>+</sup> CD43 <sup>-</sup><br>IgM <sup>+</sup> Immature<br>B     | B220 <sup>high</sup> CD43 <sup>-</sup><br>IgM <sup>+</sup> mature B |
|         | WT        | 24.2 ± 13.8                                 | 0.6 ± 0.2                                                     | 2.9 ± 0.8                                                    | 1.0 ± 0.4                                                                 | 2.1 ± 0.6                                                           |
|         | IRAK1KD   | 22.2 ± 4.4                                  | 0.4 ± 0.08                                                    | 2.1 ± 0.7                                                    | 0.8 ± 0.4                                                                 | 1.3 ± 0.6                                                           |

57

58 Counts [ $\times 10^6$ ] of cell subsets in different compartments as evaluated by flow cytometry. MLN,  
59 mesenteric lymph nodes, BM, bone marrow. Means  $\pm$  SD of 8 mice.

60

61

62 **Supplemental Table 2: Antibodies**

| <b>Flow cytometry</b>                    |              |                     |
|------------------------------------------|--------------|---------------------|
| <b>Antigen</b>                           | <b>Clone</b> | <b>Company</b>      |
| CD3                                      | 145-2c11     | eBioscience         |
| CD4                                      | RM4-5        | BD Biosciences      |
| CD8a                                     | 53-6.7       | eBioscience         |
| CD11b                                    | M1/70        | eBioscience         |
| CD11c                                    | HL3          | BD Biosciences      |
| CD16/32                                  | 2.4G2        | eBioscience         |
| CD19                                     | 1D3          | BD Biosciences      |
| CD21/35                                  | 7E9          | Biolegend           |
| CD23                                     | B3B4         | Biolegend           |
| CD25                                     | PC61.5/BC96  | eBioscience         |
| CD43                                     | S7           | BD Biosciences      |
| CD45                                     | 30-F11       | Biolegend           |
| CD45R / B220                             | RA3-6B2      | Biolegend           |
| c-Kit                                    | 2B8          | eBioscience         |
| F4/80                                    | BM8          | eBioscience         |
| Fc $\epsilon$ R1                         | MAR-1        | eBioscience         |
| FoxP3                                    | FJK-16S      | eBioscience         |
| GR-1 / Ly6G/C                            | Rb6-8C5      | BD Biosciences      |
| GL-7                                     | GL-7         | Biolegend           |
| IgM                                      | 11/41        | eBioscience         |
| Ly6C                                     | HK1.4        | Biolegend           |
| Ly6G                                     | 1A8          | Biolegend           |
| PDCA-1                                   | 927          | Biolegend           |
| TCR $\gamma\delta$                       | UC7-13D5     | eBioscience         |
| F4/80                                    | Cl:A3-1      | AbD Serotec         |
| <b>Immunohistochemistry</b>              |              |                     |
| Ly-6B2                                   | 7/4          | AbD Serotec         |
| F4/80                                    | Cl:A3-1 AbD  | AbD Serotec         |
| Rabbit-anti-rat IgG                      | polyclonal   | Vector Laboratories |
| <b>Protein detection (WES)</b>           |              |                     |
| Anti-IRAK1                               | D51G7        | Cell Signaling      |
| Anti-pIRAK4 (Thr345/Ser346)              | D6D7         | Cell Signaling      |
| Anti-IRAK4                               | 2H9          | Abcam               |
| Anti-GAPDH                               | D16H11       | Cell Signaling      |
| Anti-p38 MAPK                            | #9212        | Cell Signaling      |
| Anti-Phospho-p38 (Thr180/Tyr182)         | #9211        | Cell Signaling      |
| Anti-Phospho-NF- $\kappa$ B p65 (Ser536) | 93H1         | Cell Signaling      |
| Anti-Lamin B1                            | AF8525       | R&D Systems         |
| Anti-alpha Tubulin                       | 11H10        | Cell Signaling      |
| Anti- $\beta$ Actin                      | AC-15        | Cell Signaling      |
| Anti-rabbit-HRP detection module for WES | DM-001       | ProteinSimple       |
| Anti-mouse-HRP detection module for WES  | DM-002       | ProteinSimple       |

63

64 All monoclonal antibodies are directed against mouse antigens unless indicated otherwise.

65



66 **Supplemental Table 3: Conditions for cytokine release from WT and IRAK1KD cells.**

|                                       | <b>TLR ligand concentrations for cytokine release</b> |                        |                       |                         |                          |                          |
|---------------------------------------|-------------------------------------------------------|------------------------|-----------------------|-------------------------|--------------------------|--------------------------|
|                                       | <b>TLR3</b><br>(PolyIC*)                              | <b>TLR4</b><br>(LPS)   | <b>TLR7</b><br>(R848) | <b>TLR7</b><br>(ssRNA*) | <b>TLR9</b><br>(ODN1585) | <b>TLR9</b><br>(ODN1826) |
| <b>BMDCs (IFN<math>\alpha</math>)</b> |                                                       |                        |                       |                         |                          |                          |
| WT (EC <sub>50</sub> )                | 10 $\pm$ 0.47 (2)                                     | >10,000 (2)            | -                     | 0.69 $\pm$ 0.63<br>(13) | 160 $\pm$ 81 (6)         | -                        |
| IRAK1KD (EC <sub>50</sub> )           | 10 $\pm$ 0.31 (3)                                     | >10,000 (3)            | -                     | >30 (14)                | >10,000 (6)              | -                        |
| For Fig. 1                            | 30                                                    | 1000                   | -                     | 1                       | 1000                     |                          |
| <b>BMDCs (IL-6)</b>                   |                                                       |                        |                       |                         |                          |                          |
| WT (EC <sub>50</sub> )                | 5.5 $\pm$ 6.1 (2)                                     | 120 $\pm$ 130 (2)      | -                     | 0.57 $\pm$ 0.26<br>(14) | -                        | 3.8 $\pm$ 5.6 (5)        |
| IRAK1KD (EC <sub>50</sub> )           | 10.6 $\pm$ 0.77<br>(3)                                | 100 $\pm$ 70 (3)       | -                     | >30 (10)                | -                        | 4.0 $\pm$ 6.5 (7)        |
| For Fig. 1                            | 30                                                    | 1000                   | -                     | 3                       | -                        | 100                      |
| <b>B cells (IL-6)</b>                 |                                                       |                        |                       |                         |                          |                          |
| WT (EC <sub>50</sub> )                | >30 (2)                                               | 390 $\pm$ 330<br>(10)  | 21 $\pm$ 5 (6)        | -                       | -                        | 105 $\pm$ 37 (10)        |
| IRAK1KD (EC <sub>50</sub> )           | >30 (2)                                               | >10,000 (10)           | 27 $\pm$ 16 (6)       | -                       | -                        | 306 $\pm$ 175<br>(10)    |
| For Fig. 1                            | 30                                                    | 1000                   | 1000                  | -                       | -                        | 1000                     |
| <b>BMDMs (IL-6)</b>                   |                                                       |                        |                       |                         |                          |                          |
| WT (EC <sub>50</sub> )                | >30 (7)                                               | 0.55 $\pm$ 0.27<br>(8) | -                     | 0.45 $\pm$ 0.20 (6)     | -                        | 15 $\pm$ 4 (7)           |
| For Fig. 1                            | 30                                                    | 10                     | -                     | 1                       | -                        | 100                      |

67

68 Specific cells were isolated as indicated in Materials and Methods and stimulated with TLR agonists:  
69 TLR3 (PolyIC\*,  $\mu$ g/ml), TLR4 (LPS, ng/ml), TLR7 (R848, nM), TLR7 (ssRNA\*,  $\mu$ g/ml), TLR9 (ODN1585,  
70 nM) and TLR9 (ODN1826, nM). ODN1585 (i.e. CpG-A) was only used for elicitation of IFN $\alpha$ . The  
71 optimal TLR7 agonist for robust IFN $\alpha$  secretion was ssRNA/DOTAP and used for all BMDC  
72 experiments. Since B cells respond only weakly to ssRNA/DOTAP, R848 was instead used. Effective  
73 potency (EC<sub>50</sub>) values are geomeans  $\pm$  SD of (n) separate experiments with each dataset performed in  
74 duplicates. The concentrations of TLR ligands for each cell type used in Figure 1 were selected based  
75 on an approximate EC<sub>90</sub> for the respective WT cell type or using a concentration that gave the maximum  
76 stimulated response. \*: presence of DOTAP (25  $\mu$ g/ml).

77

78 **Supplemental Table 4: qPCR Primer sequences**

|                                  |        |                                              |
|----------------------------------|--------|----------------------------------------------|
| <b>Taqman primers and probes</b> | Cxcl10 | Mm99999072_m1                                |
|                                  | Mx1    | Mm01218004_m1                                |
|                                  | Oasl1  | Mm00455082_m1                                |
|                                  | Rasd2  | Mm00491265_m1                                |
|                                  | Irf7   | Mm00516791_g1                                |
|                                  | Ifi44  | Mm00505670_m1                                |
|                                  | Ifi44l | Mm00518988_m1                                |
|                                  | Hprt   | Mm00446968_m1                                |
|                                  | IRAK1  | Mm00434254_m1                                |
|                                  | IRAK4  | Mm00459443_m1                                |
| <b>Primers for SYBRgreen</b>     | Cxcl1  | Fwd: 5'-GTG TTG CCC TCA GGG CC-3'            |
|                                  |        | Rev: 5'-GCC TCG CGA CCA TTC TTG-3'           |
|                                  | Cxcl2  | Fwd: 5'-ACG CCC CCA GGA CCC-3'               |
|                                  |        | Rev: 5'-CTT TTT GAC CGC CCT TGA GA-3'        |
|                                  | Cxcl5  | Fwd: 5'-CTC GCC ATT CAT GCG GAT-3'           |
|                                  |        | Rev: 5'-CTT CAG CTA GAT GCT GCG GC-3'        |
|                                  | Ccl2   | Fwd: 5'-TGG CTC AGC CAG ATG CAG T-3'         |
|                                  |        | Rev: 5'-TTG GGA TCA TCT TGC TGG TG-3'        |
|                                  | IL1b   | Fwd: 5'-TGG CAA CTG TTC CTG-3'               |
|                                  |        | Rev: 5'-GGA AGC AGC CCT TCA TCT TT-3'        |
|                                  | b2m    | Fwd: 5'-CCG AAC ATA CTG AAC TGC TAC GTA A-3' |
|                                  |        | Rev: 5'-CCC GTT CTT AGC ATT TGG A-3'         |

79

80

81

82

83

84 **Supplemental Table 5: Characteristics of patients for knee joint immunohistochemistry**

85

| <b>Patient</b> | <b>Sex</b> | <b>Age</b> | <b>Description</b>                                                         |
|----------------|------------|------------|----------------------------------------------------------------------------|
| RA 1           | M          | 65         | Thickening of synovial layer, inflammatory infiltrate                      |
| RA 2           | M          | 71         | Hyperplastic synovial membranes, infiltrations.<br>Krenn synovitis score 7 |
| RA 3           | F          | 58         | Hyperplastic synovial membrane, infiltrated.<br>Krenn synovitis score 9    |
| Non-inflamed 1 | F          | 55         | Single-layered synovial membrane, no infiltrate                            |
| Non-inflamed 2 | M          | 71         | Fibrotic connective tissue, no inflammation                                |
| Non-inflamed 3 | M          | 73         | Fibrotic scar tissue with histiocytic reaction                             |

86
